# Supplementary material for: Large meta-analysis of multiple cancers reveals a common, compact and highly prognostic hypoxia metagene
Source: PubMed Central journal article supplement (PMC2816644; doi:10.1038/sj.bjc.6605450), 2010-01-19

**Figure S2.** The overlap between pairs of seed clusters (ie. the S score) is plotted as a function of the correlation between the expression values for the same pair of seeds. The seeds were set to the 'literature list' (<http://cancerres.aacrjournals.org/cgi/data/67/7/3441/DC1/1>); Vice125 dataset was used (Table 1).

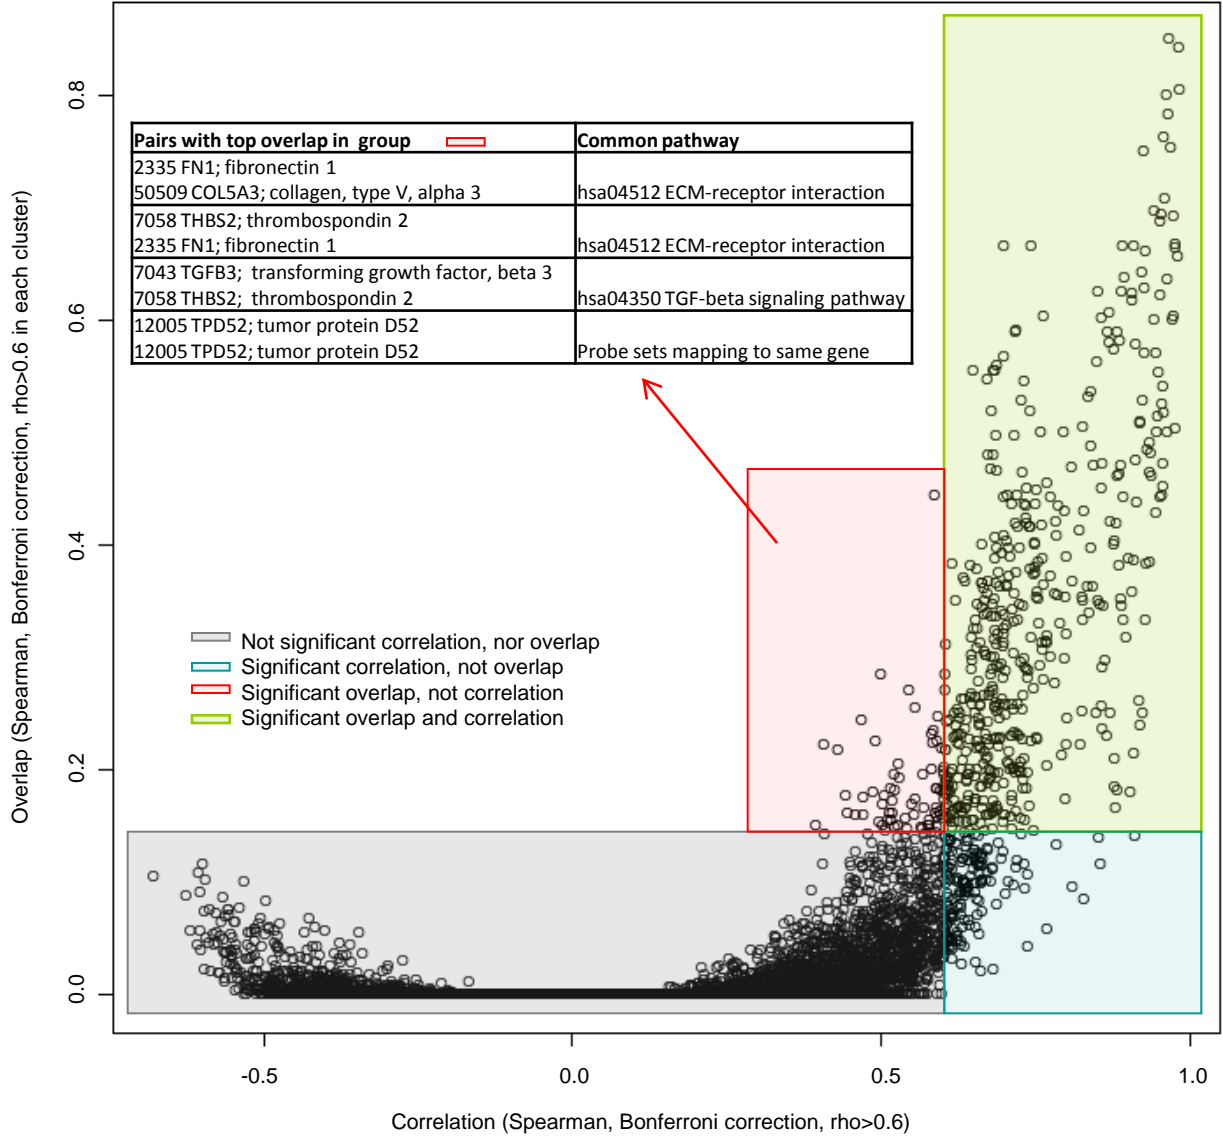

Supplement: 6605450x2.pdf [file 6605450x2.pdf]
